# Supplementary material for: Hierarchical self-assembly of amino acid derivatives into stimuli-responsive luminescent gels
Source: Royal Society of Chemistry journal article supplement (doi:10.1039/c4sm01613k), 2014-09-04
Supplement: c4sm01613k1.pdf [file c4sm01613k1.pdf]

Cite this: DOI: 10.1039/c0xx00000x

www.rsc.org/xxxxxx

ARTICLE TYPE

## Supporting Information

# Hierarchical Self-assembly of Amino Acid Derivatives into Stimuli-Responsive Luminescent Gels

Yibao Li<sup>a, ‡</sup>, Linxiu Cheng<sup>a, ‡</sup>, Chunhua Liu<sup>a</sup>, Yunzhi Xie<sup>a</sup>, Wei Liu<sup>a</sup>, Yulan Fan<sup>a</sup>, Xun Li<sup>a</sup> and Xiaolin Fan<sup>a, \*</sup>

<sup>a</sup>Key Laboratory of Organo-pharmaceutical Chemistry, Gannan Normal University, Ganzhou 341000, P. R. China.  
E-mail: Fanxl2013@gnnu.cn

Received (in XXX, XXX) Xth XXXXXXXXXX 20XX, Accepted Xth XXXXXXXXXX 20XX

10 DOI: 10.1039/b000000x

### 1) Synthesis and characterization of amino acid derivatives (PP, VP and AP)<sup>S1,S2</sup>

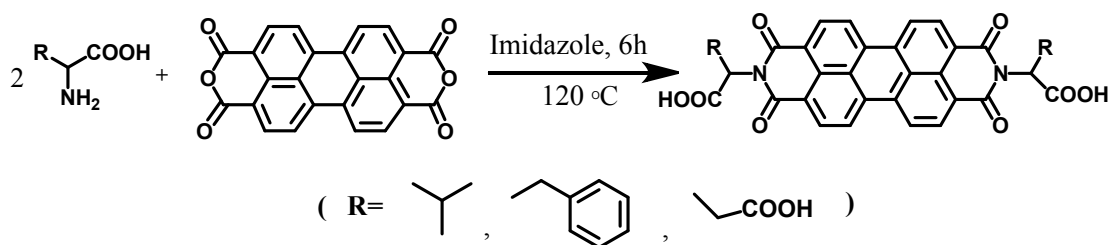

Scheme S1 Synthesis route of amino acid derivatives.

#### Synthesis of phenylalanine-functionalized perylene derivatives (PP)

15 0.392 g (1.0 mmol) perylene-3, 4, 9, 10-tetracarboxylic dianhydride, 0.330 g (2.0 mmol) L-phenylalanine and 2.0 g imidazole were heated at 120 °C for 6 hrs under nitrogen atmosphere. Then 50 mL of H<sub>2</sub>O was poured into the hot mixture, refluxed for 6 hrs and cooled down, then added 1.0 mol/L HCl in dropwise till the mixture into acidity. Keeping the mixture in ambient temperatures overnight to let it precipitate out. The precipitate was filtered and washed with H<sub>2</sub>O. The product was dried at room temperature to get mulberry powder (yield: 0.57g, 83%). The structure and purity of the product were confirmed by <sup>1</sup>H NMR, FT-IR and MS.

20 <sup>1</sup>H NMR (400 MHz, DMSO-d, 20 °C, TMS, ppm): δ: 8.45 (d, 4.0 H), 8.31 (d, 4.0 H), 7.06-7.23 (m, 10.0 H), 5.92-5.95 (t, 2.0 H), 3.32-3.64 (d, 4.1 H).

FT-IR (KBr): 3473.0, 3413.7, 2927.2, 2602.6, 2356.0, 2320.0, 2009.0, 1696.2, 1645.5, 1591.1, 1505.2, 1438.8, 1400.5, 1349.2, 1252.4, 1129.2, 853.8, 805.9, 745.2, 699.2, 617.4 cm<sup>-1</sup>.

MS (MALDI-TOF): 686.7 (calcd. 686.7, M)

#### 25 Synthesis of valine-functionalized perylene derivatives (VP)

Similar procedure as like preparation of VP was followed for the synthesis of PP (yield: 0.51g, 87%).

<sup>1</sup>H NMR (400 MHz, DMSO-d, 20 °C, TMS, ppm): δ: 8.61-8.62 (d, 4.0 H), 8.42-8.44 (d, 4.0 H), 5.18-5.20 (d, 2.0 H), 3.35-3.45 (m, 2.0 H), 1.26-1.28 (d, 6.0 H), 0.78-0.79 (d, 6.0 H).

FT-IR (KBr): 3460.3, 2963.9, 1698.3, 1656.6, 1591.9, 1434.2, 1401.7, 1342.4, 1252.5, 1174.3, 1124.1, 970.5, 854.8, 808.2, 748.1, 657.3.

30 MS (MALDI-TOF): 590.0 (calcd. 590.6, M)

#### Synthesis of aspartic-functionalized perylene derivatives (AP)

Similar procedure as like preparation of AP was followed for the synthesis of PP (yield: 0.49g, 79%).

<sup>1</sup>H NMR (400 MHz, DMSO-d, 20 °C, TMS, ppm): δ: 8.37-8.56 (d, 4.1 H), 8.12-8.35 (d, 4.0 H), 6.02-6.06 (t, 2.0 H), 2.48-2.85 (d, 4.0 H).

FT-IR (KBr): 3437.8, 2942.5, 2364.1, 1898.8, 1864.4, 1689.9, 1433.8, 1400.6, 1381.0, 1266.8, 1176.6, 1132.7, 881.1, 808.1, 749.4, 633.9 cm<sup>-1</sup>.

35 MS (MALDI-TOF): 622.1 (calcd. 622.5, M)

## 2) Additional Gelation properties in various solvents

**Table S1** Gelation properties in various solvents.<sup>a</sup>

| Solvents/system              | BP | PP | VP | AP |
|------------------------------|----|----|----|----|
| n-Hexane                     | I  | I  | I  | I  |
| THF                          | S  | P  | P  | P  |
| Acetone                      | S  | P  | P  | P  |
| Ethanol                      | S  | S  | P  | P  |
| Acetonitrile                 | P  | P  | P  | I  |
| DMF                          | S  | S  | S  | S  |
| H <sub>2</sub> O             | P  | I  | I  | I  |
| DMSO                         | S  | S  | S  | S  |
| Chloroform                   | I  | I  | I  | I  |
| Acetic acid                  | S  | P  | P  | P  |
| 1, 4-Dioxane                 | S  | P  | P  | P  |
| Mixed solvent 1 <sup>b</sup> | S  | P  | P  | P  |
| Mixed solvent 2 <sup>c</sup> | S  | P  | P  | P  |

<sup>a</sup> G = gel, S = Solution, P = precipitation, I=insoluble. <sup>b</sup>volume ratio of acetonitrile-1, 4- dioxane (2: 1), <sup>c</sup>Volume ratio of ethanol-1, 4- dioxane (2: 1). The critical gelation concentrations of the gelators are given in parentheses [%w/v]

## 3) Additional photos of gels

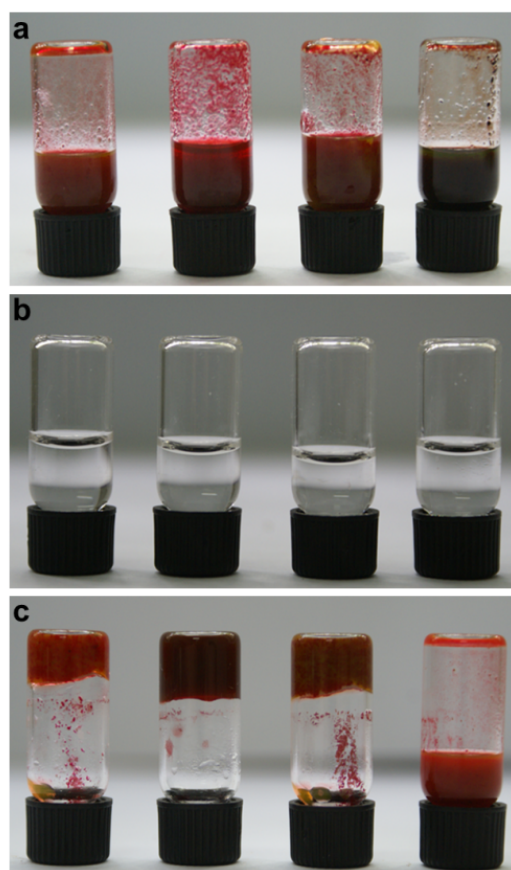

**Fig. S1** (a) Optical images of pure compounds in different solvents, from left to right, PP solution in acetic acid, VP solution in mixed solvent 1, VP solution in mixed solvent 2 and AP solution in THF. (b) Photo of BP solution in acetic acid, mixed solvent 1, mixed solvent 2 and THF. (c) Photo of PP/BP=1: 2 in acetic acid, VP/BP=1: 2 in mixed solvent 1, VP/BP=1: 2 in mixed solvent 2, AP/BP=1: 2 in THF.

#### 4) Additional SEM images

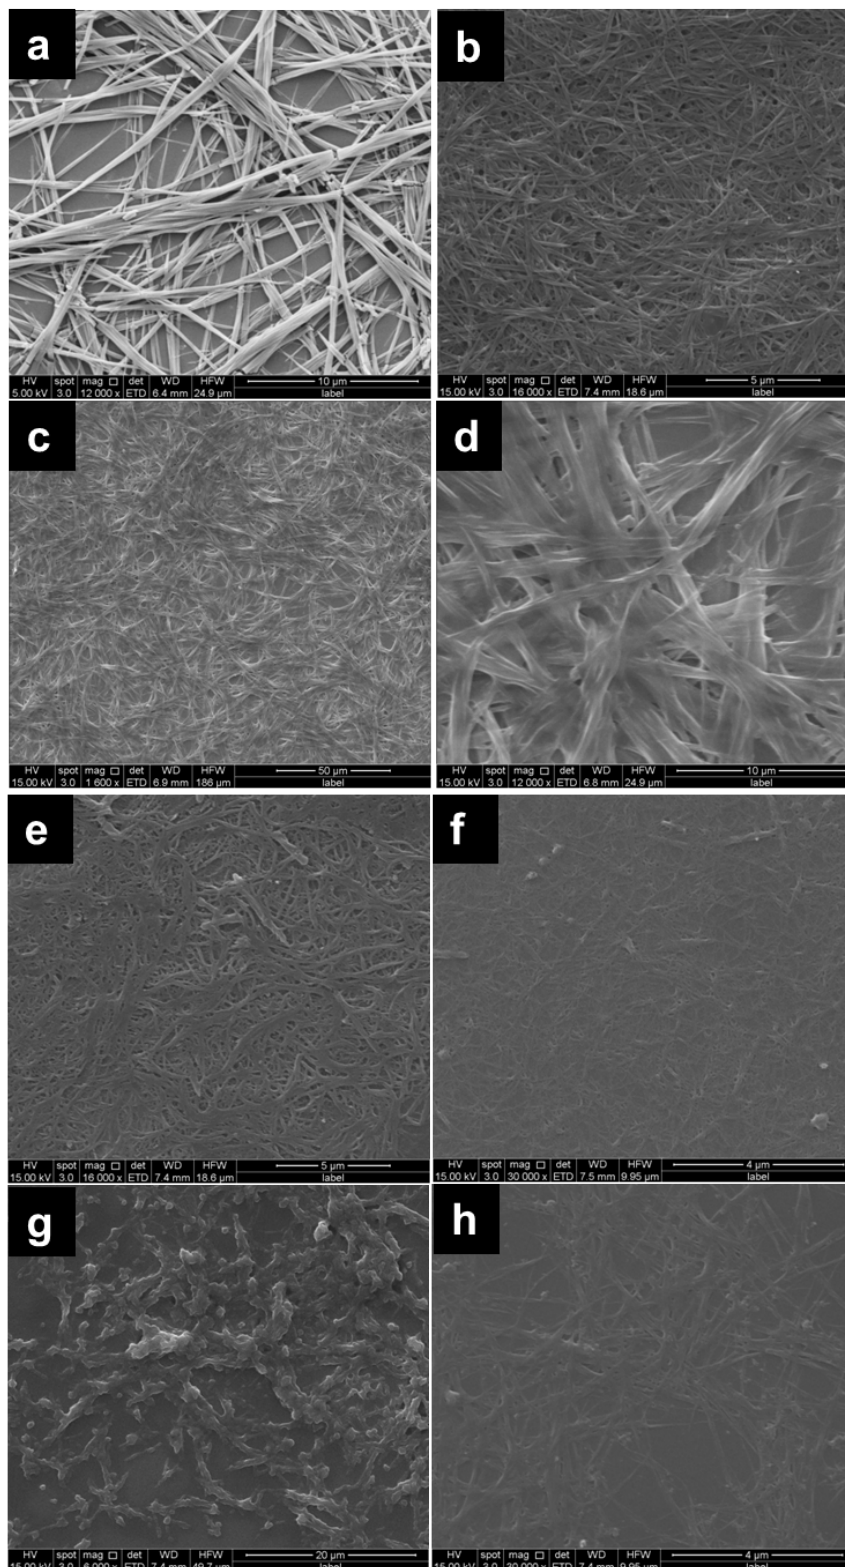

**Fig. S2** SEM images, (a) for PP/ BP =1: 2 gel ([PP] =  $5 \times 10^{-4}$  M) in THF, (b) for VP/ BP =1: 2 gel ([VP] =  $10^{-2}$  M) in mixed solvent 2; (c) for PP/ BP =1: 2 gel ([PP] =  $10^{-2}$  M) in acetic acid in larger scale, (d) for PP/ BP =1: 2 gel ([PP] =  $10^{-2}$  M) in acetic acid in small scale; (e) for VP/ BP =1: 2 gel ([VP] =  $10^{-2}$  M) in mixed solvent 1, (f) for VP/ BP =1: 2 gel ([VP] =  $5 \times 10^{-4}$  M) in mixed solvent 1; (g) for AP/ BP =1: 2 gel ([AP] =  $10^{-2}$  M) in THF, (f) for AP/ BP =1: 2 gel ([AP] =  $5 \times 10^{-4}$  M) in THF.

## 5) Rheological data

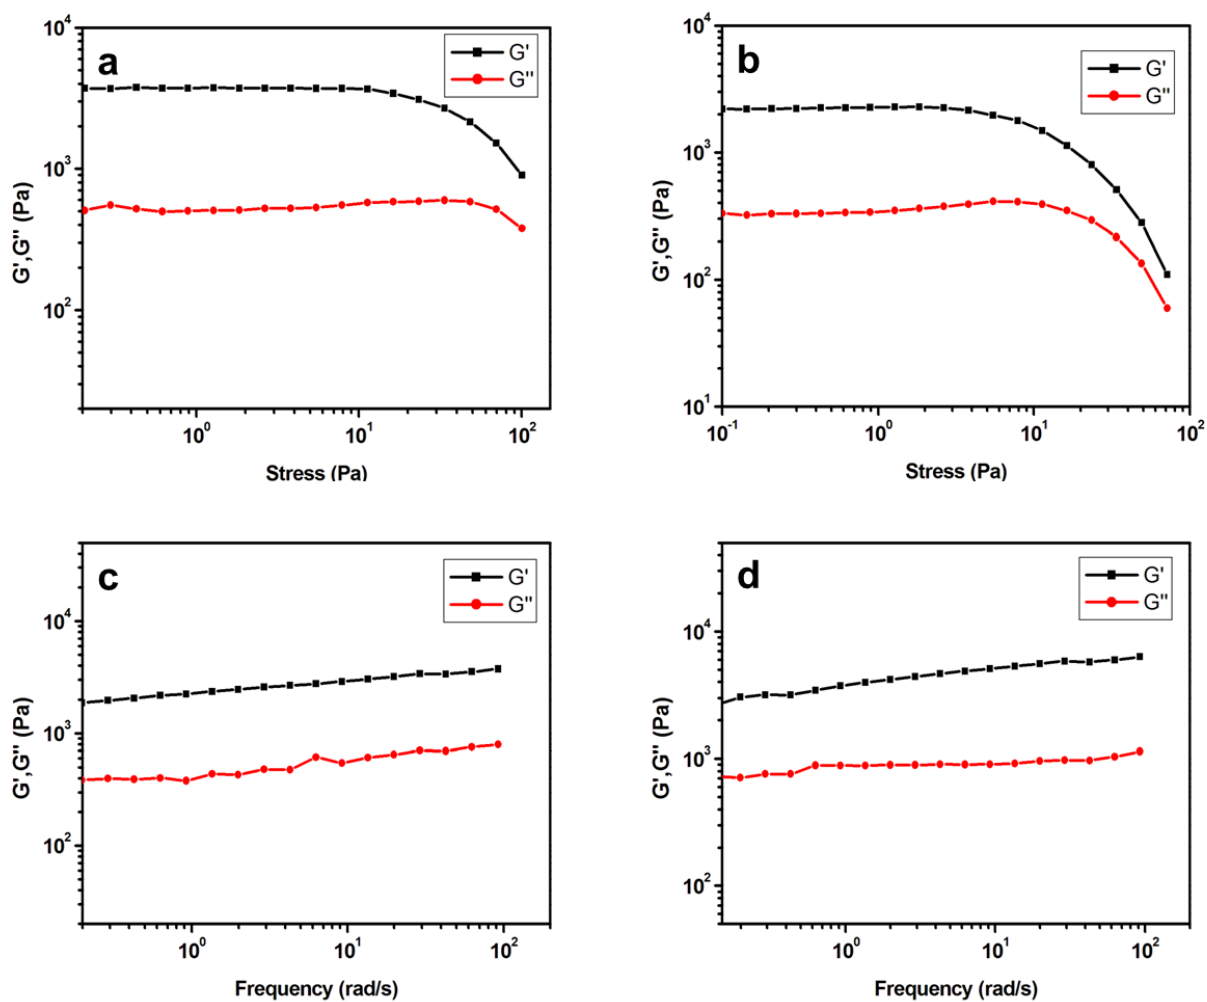

Fig. S3 (a) Stain sweep of the VP/BP gel in mixed solvent 1 at a frequency of  $6.28 \text{ rad s}^{-1}$ ; (b) Stain sweep of the VP/BP gel in mixed solvent 2 at a frequency of  $6.28 \text{ rad s}^{-1}$ ; (c) frequency sweep of the VP/BP gel in mixed solvent 1 at a strain of 0.1%; (d) frequency sweep of the VP/BP gel in mixed solvent 2 at a strain of 0.1%

5

10

15

## 6) FTIR results

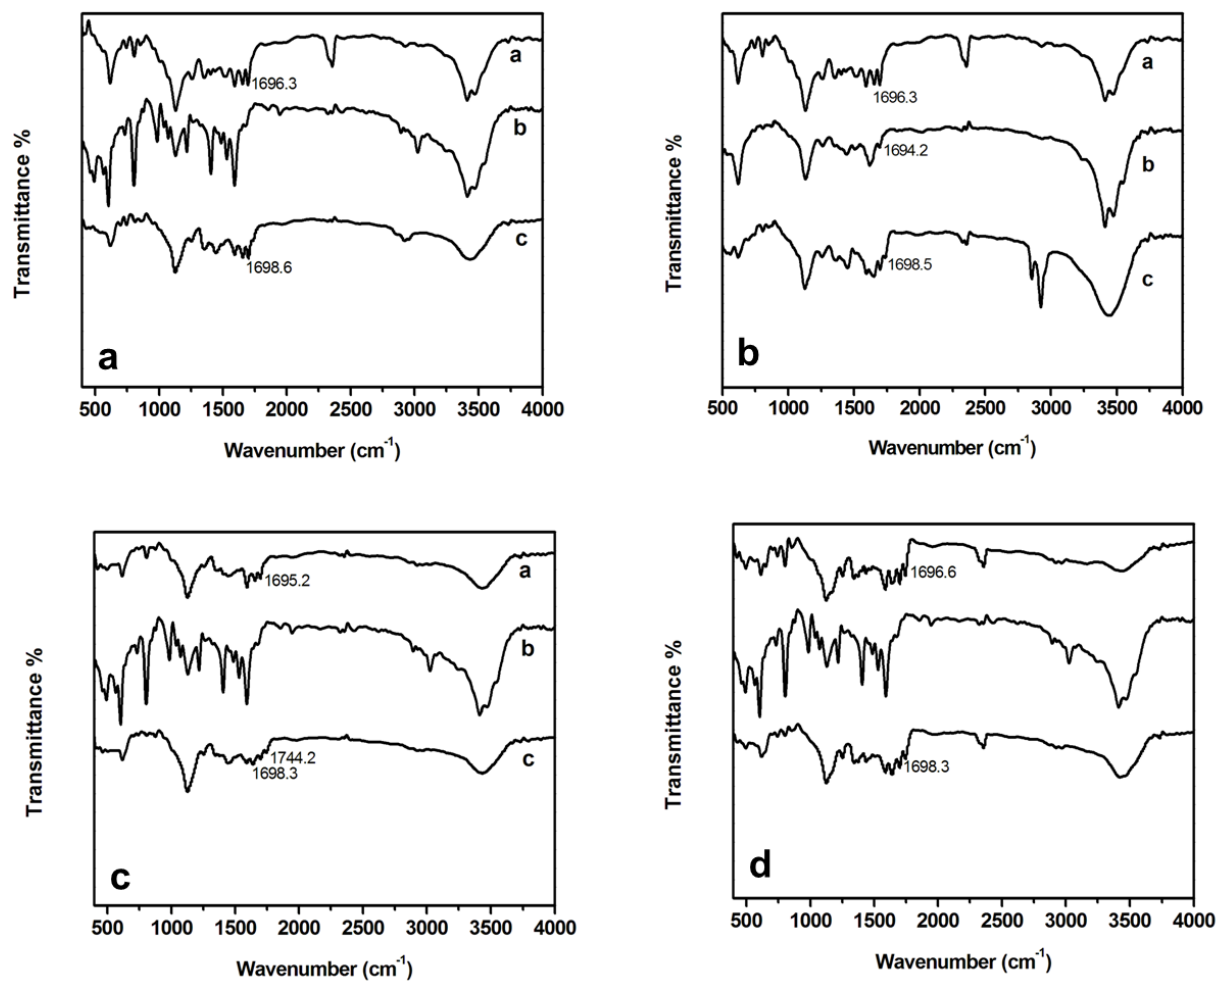

5 **Fig. S4** (a) FT-IR spectra diluted with KBr for a-PP/BP=1:2 dried gel, b-pure BP, c-pure PP, the solvent of gel is THF; (b) FT-IR spectra for a-PP/BP=1:2 dried gel, b-PP/BP=1:1 dried gel and c-PP/BP=2:1 dried gel, the solvent of gel is THF; (c) FT-IR spectra for a-VP/BP=1:2 dried gel, b-pure BP, c-pure VP, the solvent of gel is mixed solvent 1; (d) FT-IR spectra for a-VP/BP=1:2 dried gel, b-pure BP, c-pure VP, the solvent of gel is mixed solvent 2.

10

15

20

## 7) Fluorescence data

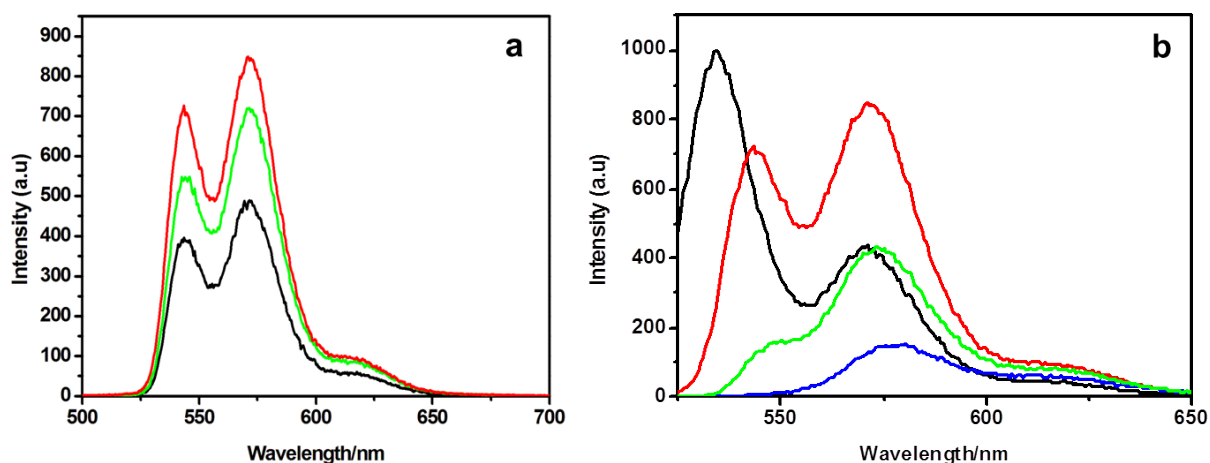

Fig. S5 (a) Fluorescence spectra of PP with different molar equivalent of BP at room temperature,  $[PP] = 10^{-5}$  M,  $\lambda_{ex}=486$  nm, [pathlength = 5 mm]. (Red line for PP/BP=1:2, green line for PP/BP=1:1, black line for PP/BP=2:1.); (b) Concentration dependent fluorescence spectra of PP/ BP = 1: 2 system at 20 °C at high concentration. (Black line for  $[PP] = 10^{-5}$  M, red line for  $[PP] = 10^{-4}$  M, green line for  $[PP] = 5 \times 10^{-4}$  M, blue line for  $[PP] = 10^{-3}$  M.)

## 8) Additional photos of gels tuned by triethylamine

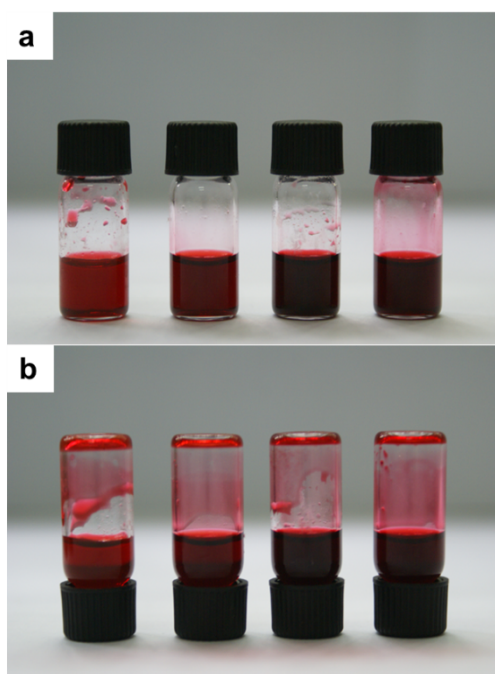

Fig. S6 (a) Upright optical images of gel tuned by triethylamine in different solvents, from left to right, PP/BP-TEA in acetic acid, VP/BP-TEA in mixed solvent 1, VP/BP-TEA in mixed solvent 2, AP/BP-TEA in THF; (b) Inverted optical images of gel tuned by triethylamine in different solvents, from left to right, PP/BP-TEA in acetic acid, VP/BP-TEA in mixed solvent 1, VP/BP-TEA in mixed solvent 2, AP/BP-TEA in THF.

## 9) References

- S1 B. A. Jones, M. J. Ahrens, M. H. Yoon, A. Facchetti, T. J. Marks, M. R. Wasielewski, *Angew. Chem. Int. Ed.*, 2004, **43**, 6363–6366.  
S2 R. Sun, C. Xue, M. Owak, R. M. Peetz, S. Jin, *Tetrahedron Lett.*, 2007, **48**, 6696–6699.
